# Supplementary material for: Long noncoding RNA TINCR facilitates hepatocellular carcinoma progression and dampens chemosensitivity to oxaliplatin by regulating the miR-195-3p/ST6GAL1/NF-κB pathway
Source: PubMed Central journal article supplement (PMC8722212; doi:10.1186/s13046-021-02197-x), 2022-01-03

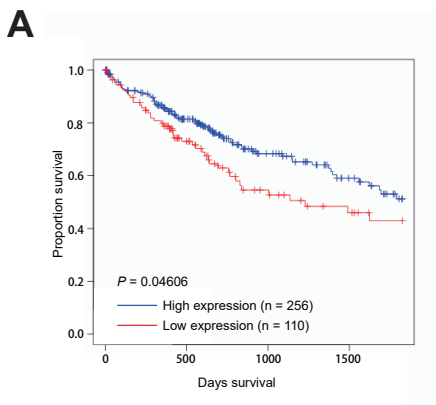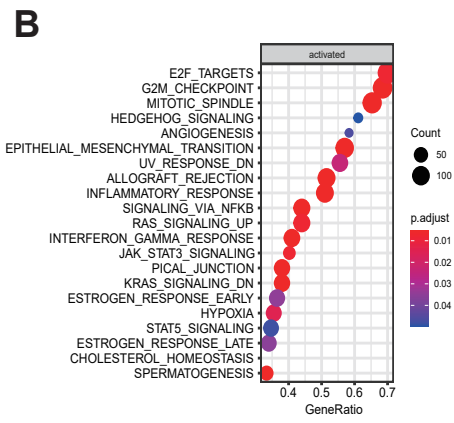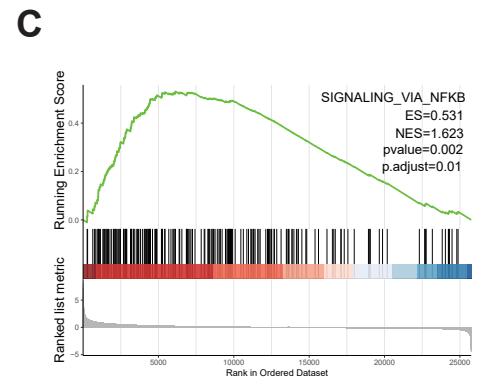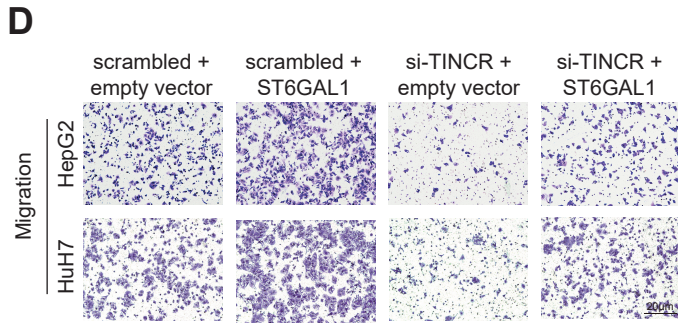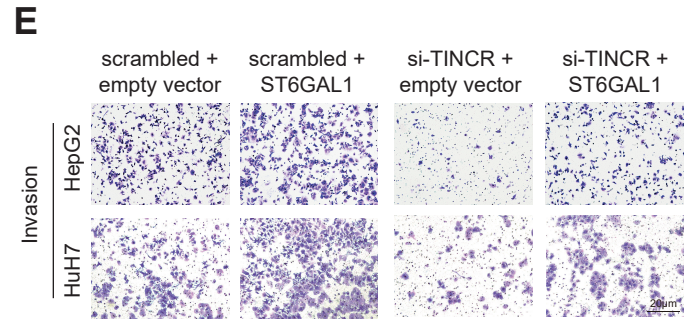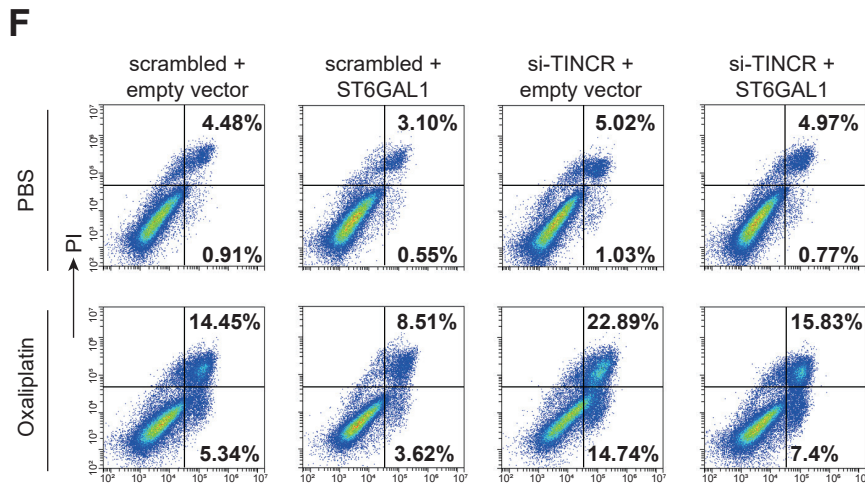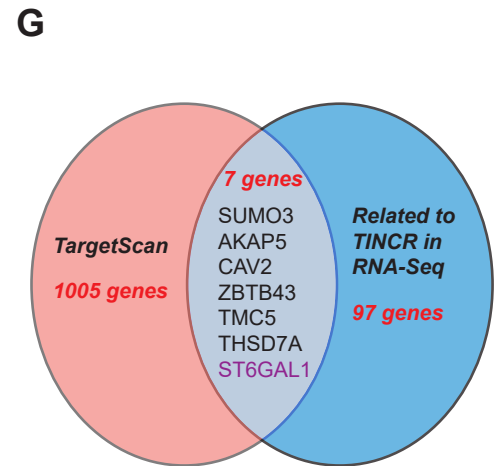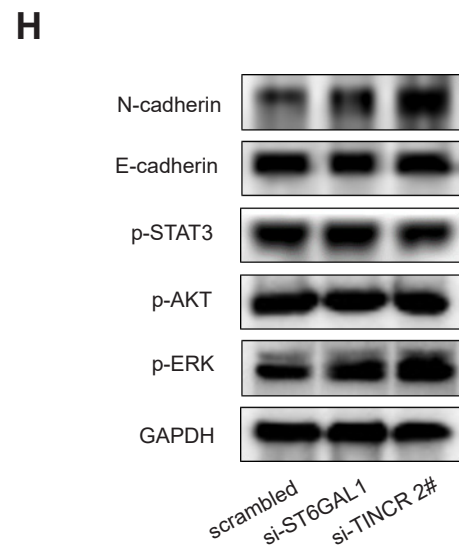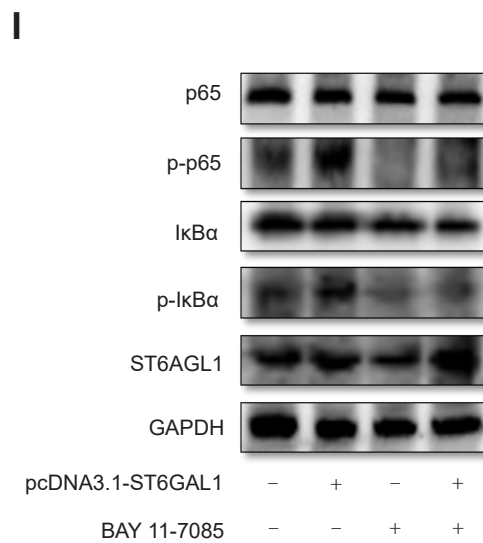

Supplement: 13046_2021_2197_MOESM2_ESM.pdf [file 13046_2021_2197_MOESM2_ESM.pdf]
