# Supplementary material for: Long noncoding RNA TINCR facilitates hepatocellular carcinoma progression and dampens chemosensitivity to oxaliplatin by regulating the miR-195-3p/ST6GAL1/NF-κB pathway
Source: Springer Nature journal article supplement (doi:10.1186/s13046-021-02197-x), 2022-01-03

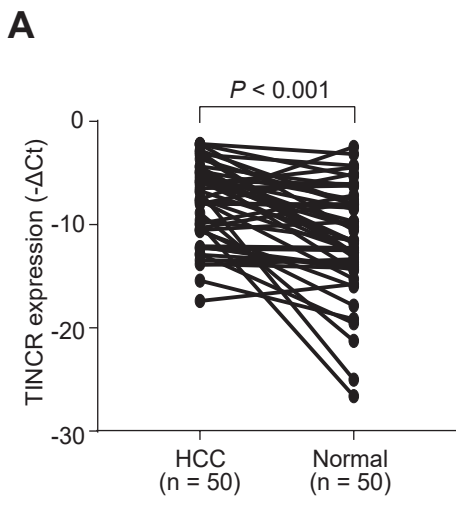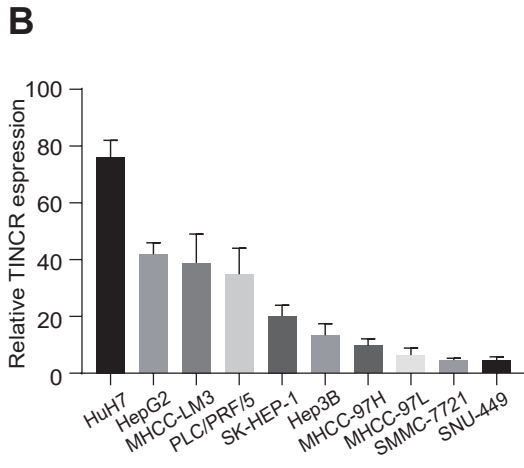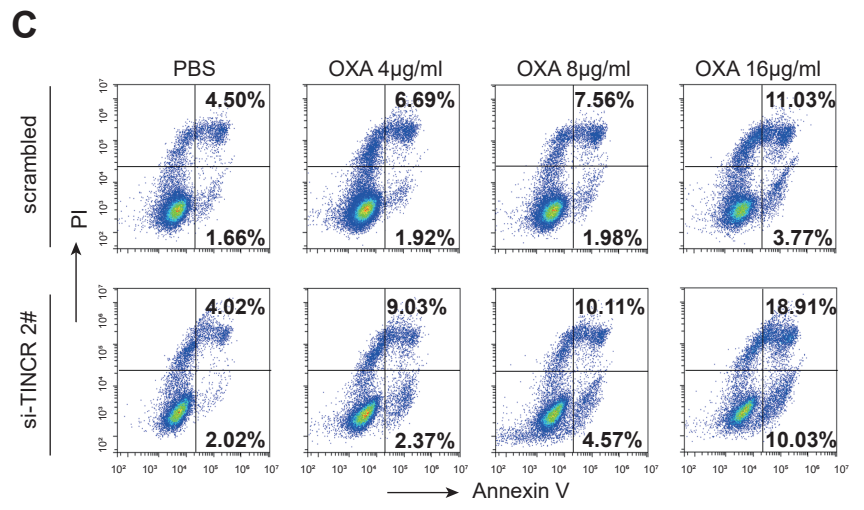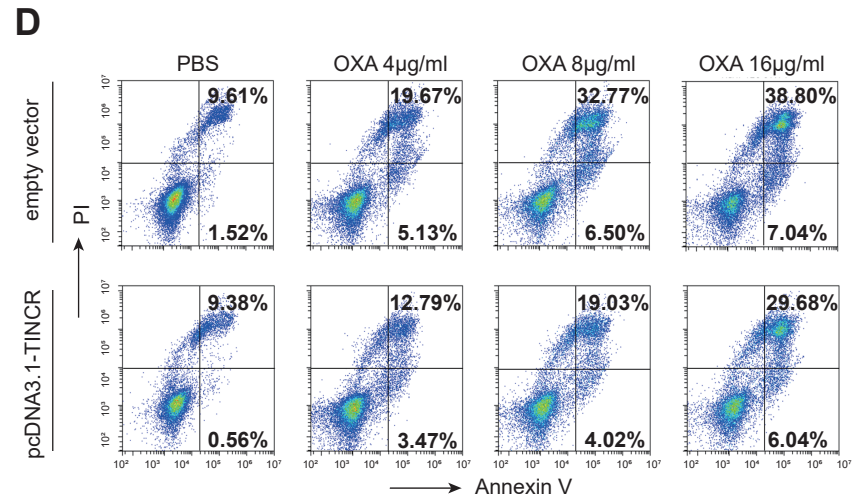

Supplement: MOESM1 [file 19991762]
